# Supplementary material
Source: publisher site journal article supplement (https://www.dovepress.com/article/485235)
Supplement: Supplementary file 1 [file get_supplementary_file.php]

**Supplementary Table 1.** Laboratory test results on different days after hospital admission.

| Tests (reference range) | Day 1 | Day 2 | Day 4 | Day 8 | Day 25 |
| --- | --- | --- | --- | --- | --- |
| WBC, ×109/L (3.5-9.5) | 16.08 | 17.78 | 13.88 | 10.76 | 8.65 |
| NE, % (0.40-0.75) | 0.95 | 0.93 | 0.92 | 0.87 | 0.84 |
| LY, % (0.20-0.50) | 0.02 | 0.04 | 0.05 | 0.09 | 0.08 |
| CRP, mg/L (0-3.5) | 144.66 |  | 198.97 | 127.97 | 82.98 |
| PCT, ng/mL (0-0.5) | 0.61 |  |  | 0.38 | 0.14 |
| HB, g/L (130-175) | 102 | 94 | 94 | 86 | 83 |

WBC, white blood cells; NE, Neutrophil; LY, Lymphocyte; CRP, C-reactive protein; PCT, procalcitonin; HB, hemoglobin.

**Supplementary Table 2.** Arterial blood gas analysis results on different days after hospital admission.

| Analysis (reference range) | Day 1 | Day 2 | Day 25 | Day 26 | Day 30 |
| --- | --- | --- | --- | --- | --- |
| pH (7.35-7.45) | 7.38 | 7.4 | 7.49 | 7.47 | 7.48 |
| pCO2, mmHg (32-48) | 32 | 34 | 30 | 32 | 31 |
| pO2, mmHg (83-108) | 81 | 65 | 81 | 145 | 74 |
| HCO3, mmol/L (24+/-2) | 18 | 20 | 22.9 | 23.3 | 23.1 |
| Base excess, mmol/L (+/-2) | -5.4 | -3.4 | 0.1 | -0.2 | 0 |
| Lactate, mmol/L (≤2) | 1 | 1.2 | 1.1 | 1.2 | 0.9 |
| SaO2, % (95-98) | 94 | 92 | 97 | 99 | 96 |
| Oxygen supply | Nasal cannula (oxygen 3 L/min) | Nasal cannula (oxygen 3 L/min) | Nasal cannula (oxygen concentration 40%, flow rate 40 L/min) | Nasal cannula (oxygen concentration 40%, flow rate 40 L/min) | Nasal cannula (oxygen concentration 35%, flow rate 35 L/min) |
